# Supplementary material for: Cluster-model DFT simulations of the infrared spectra of triazine-based molecular crystals
Source: Royal Society of Chemistry journal article supplement (doi:10.1039/c8cp01550c), 2018-01-01
Supplement: c8cp01550c1.pdf [file c8cp01550c1.pdf]

Electronic Supplementary Information:

## **Cluster-model DFT simulations of the infrared spectra of triazine-based molecular crystals**

Xiaohong Yuan,<sup>a</sup> Kun Luo,<sup>ab</sup> Nan Liu,<sup>a</sup> Xueqiang Ji,<sup>a</sup> Chao Liu,<sup>a</sup> Julong He,<sup>a</sup> Guangjun Tian,<sup>b</sup>  
Yuanchun Zhao<sup>\*a</sup> and Dongli Yu<sup>\*a</sup>

<sup>a</sup>State Key Laboratory of Metastable Materials Science and Technology, Yanshan University,  
Qinhuangdao 066004, China.

<sup>b</sup>Hebei Key Laboratory of Microstructural Material Physics, School of Science, Yanshan University,  
Qinhuangdao 066004, China

\*E-mail: yzhao56@ysu.edu.cn (Y.C.Z.); ydl@ysu.edu.cn (D.L.Y.)

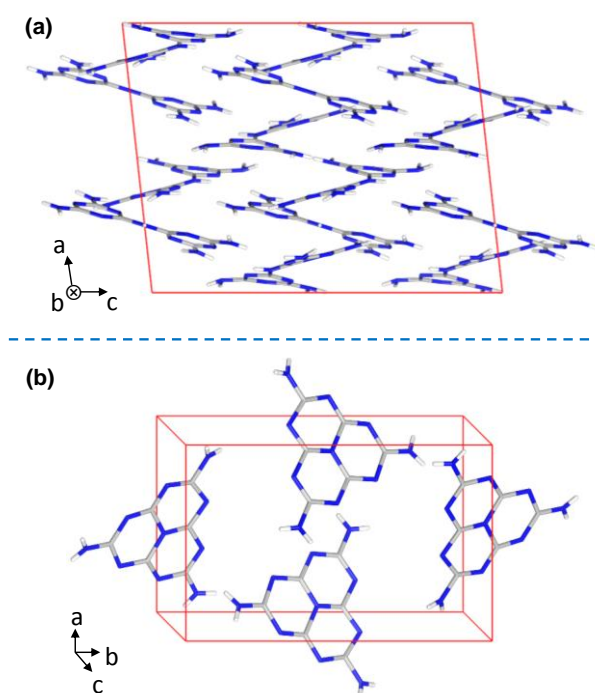

**Fig. S1** Crystal structures of (a) melam reported by Lotsch and Schnick in ref. S1 (lattice parameters:  $C2/c$ ,  $a = 18.11 \text{ \AA}$ ,  $b = 10.87 \text{ \AA}$ ,  $c = 13.98 \text{ \AA}$ , and  $\beta = 96.31^\circ$ ) and (b) melem reported by Jürgens et al. in ref. S2 (lattice parameters:  $P2_1/c$ ,  $a = 7.40 \text{ \AA}$ ,  $b = 8.65 \text{ \AA}$ ,  $c = 13.38 \text{ \AA}$ , and  $\beta = 99.91^\circ$ ). The C, N, and H atoms are distinguished with dark grey, blue, and light grey colors, respectively.

**Note:** The crystal structure and X-ray diffraction pattern of melamine can be found in our previous work.<sup>S3</sup>

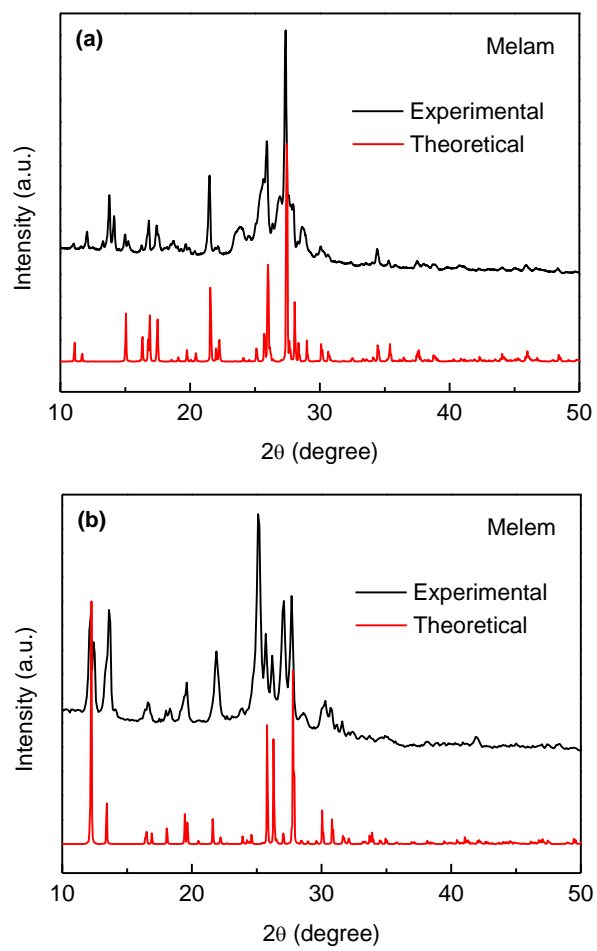

**Fig. S2** Experimental and theoretically generated XRD patterns of (a) melam, and (b) melem.

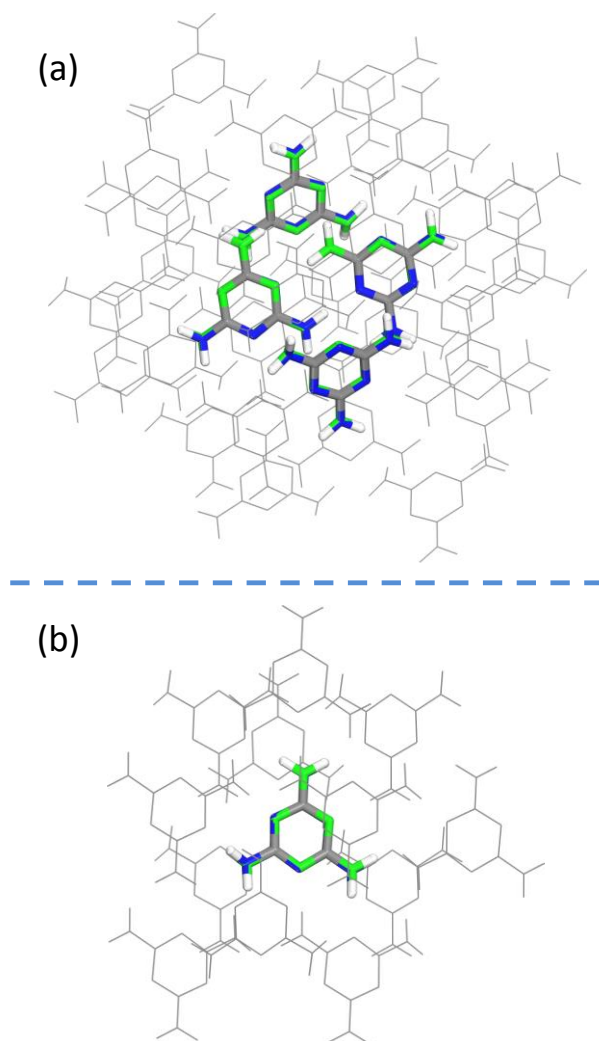

**Fig. S3** Comparison between molecular geometries before and after geometry optimization of (a) the 32-molecule cluster, and (b) the 13-molecule cluster of melamine. The **blue(N)**-grey(C)-white(H) colored structures represent the models directly extracted from **the crystal structure of melamine**, and the **green(N)**-grey(C)-white(H) colored structures are those **optimized by Gaussian 16 software package** for further IR calculations.

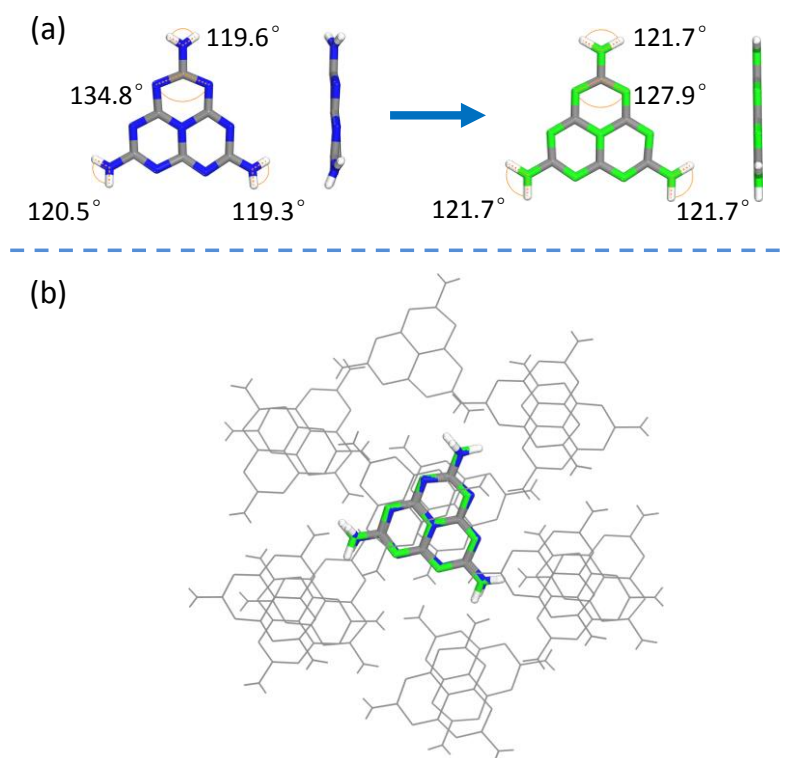

**Fig. S4** Comparison between molecular geometries before and after geometry optimization of (a) a single molecule, and (b) the built 16-molecule cluster of melem. The **blue(N)**-grey(C)-white(H) colored structures represent the models directly extracted from **the crystal structure of melem**, and the **green(N)**-grey(C)-white(H) colored structures are those **optimized by Gaussian 16 software package** for further IR calculations.

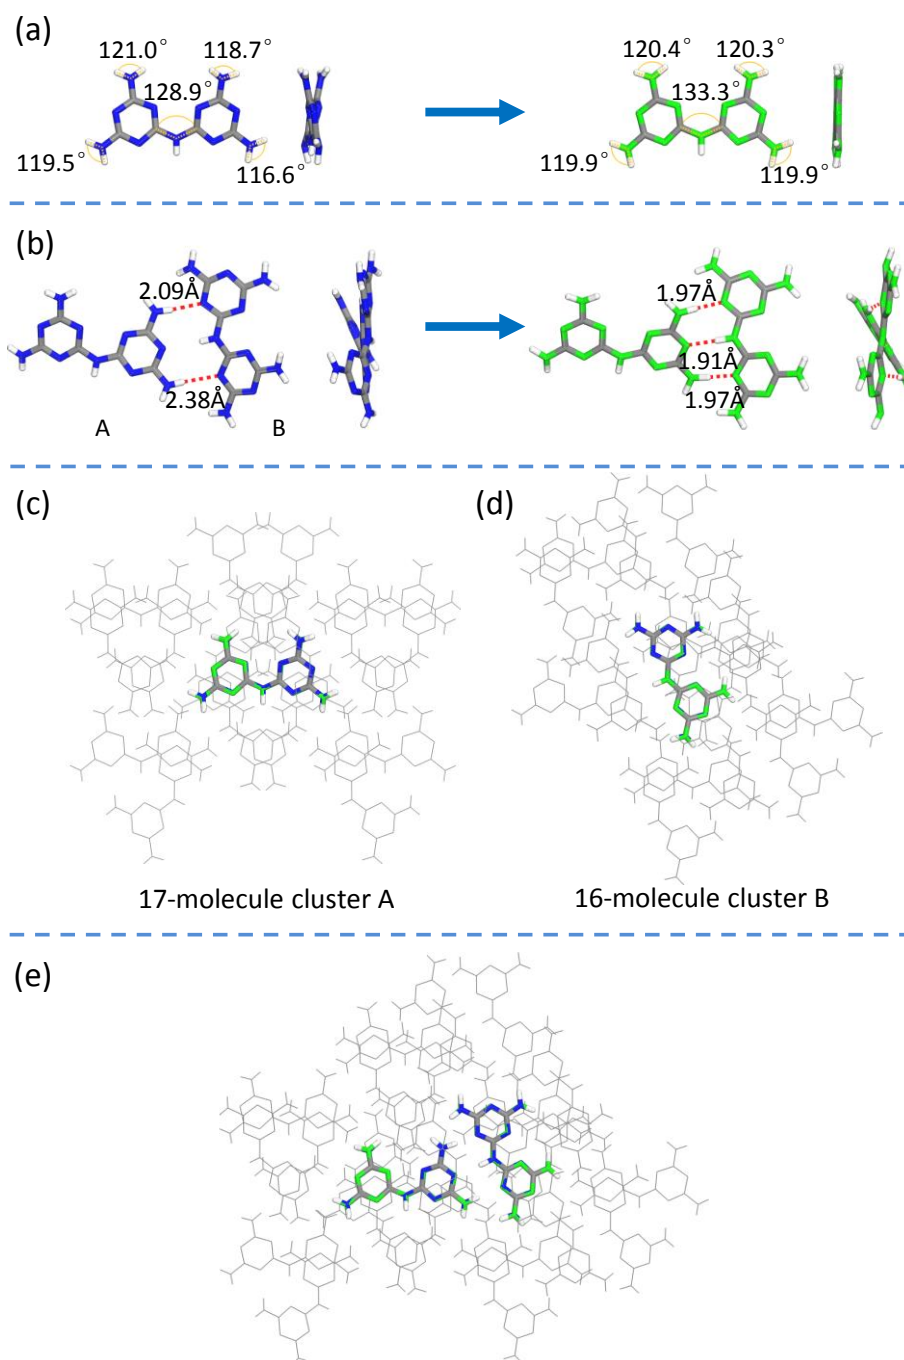

**Fig. S5** Comparison between molecular geometries before and after geometry optimization of (a) a single molecule and (b) the 2-molecule cluster, (c) the 17-molecule cluster A, (d) the 16-molecule cluster B, and (e) the finally built 25-molecule cluster of melam. The **blue(N)**-grey(C)-white(H) colored structures represent the models directly extracted from **the crystal structure of melam**, and the **green(N)**-grey(C)-white(H) colored structures are those **optimized by Gaussian 16 software package** for further IR calculations.

**Table S1** Details of the molecules and cluster models designed for IR calculations in this work, which were directly extracted from the corresponding crystal structures and the geometry optimizations were performed by the Gaussian 16 software package.

|          | models                | total atom numbers | Representative molecules | numbers of the surrounding molecules hydrogen-bonded with the representative ones | numbers of the formed hydrogen bonds with the representative molecules | computational costs <sup>a</sup> |
|----------|-----------------------|--------------------|--------------------------|-----------------------------------------------------------------------------------|------------------------------------------------------------------------|----------------------------------|
| melamine | 32-molecule cluster   | 480                | 4                        | 12                                                                                | 30                                                                     | 31 h                             |
|          | 13-molecule cluster   | 195                | 1                        | 4                                                                                 | 8                                                                      | 4.5 h                            |
| melem    | single molecule       | 22                 | 1                        | 0                                                                                 | 0                                                                      | 0.5 h                            |
|          | 16-molecule cluster   | 352                | 1                        | 5                                                                                 | 8                                                                      | 12.2 h                           |
| melam    | single molecule       | 26                 | 1                        | 0                                                                                 | 0                                                                      | 0.6 h                            |
|          | 2-molecule cluster    | 52                 | 2                        | 0                                                                                 | from 2 to 3 (before and after geometry optimization)                   | 3 h                              |
|          | 17-molecule cluster A | 442                | 1                        | 6                                                                                 | 10                                                                     | 24 h                             |
|          | 16-molecule cluster B | 416                | 1                        | 6                                                                                 | 11                                                                     | 19 h                             |
|          | 25-molecule cluster   | 650                | 2                        | 10                                                                                | 19                                                                     | 65.5 h                           |
|          |                       |                    |                          |                                                                                   |                                                                        |                                  |

<sup>a</sup>Computer server: Super Sever X10QBL-4, 4 x 2.10 GHz Xeon<sup>®</sup> Processor E7-8870 v3/18 Core, 16 x 16 GB ECC DDR3/2133 MHz; the single-molecule models (melem and melam) and the 2-molecule model of melam were calculated using 20 cores with a memory of 45 GB; the rest of 6 cluster models were calculated using 60 cores with a memory of 230 GB.

**Note:** As summarized in Table S1, totally 9 models have been designed for the IR simulations in this work. By considering the crystallographic equivalence of the corresponding crystal structures, only one representative molecule has been determined for melamine and melem, respectively; while for melam two crystallographically independent molecules need to be considered. We have further built specific cluster models based on the two different molecules of melam A and B (Fig. S5), which present different molecule numbers as well as distinct hydrogen-bonding environments. For the 2-molecule cluster of melam, two hydrogen bonds are formed between the considered molecules, whereas after geometry optimization an additional hydrogen bond is formed with the bridging N–H bond of melam B (Fig. S5b). The computational costs of all the listed models have also been combined into Table S1 as a reference.

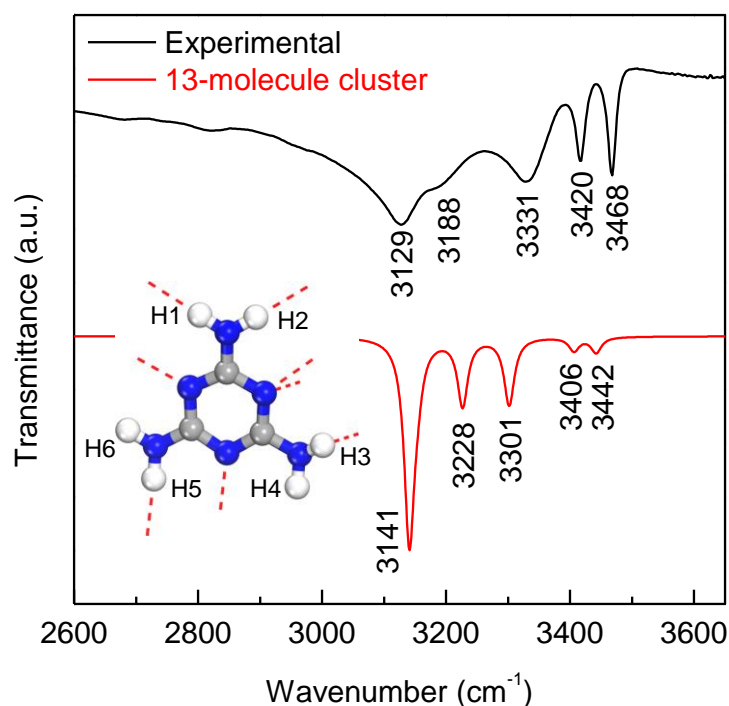

**Fig. S6** Zoomed FTIR spectra of melamine showing the characteristic  $\text{NH}_2$  stretching region. The inset shows the representative molecule and the formed hydrogen bonds,  $\text{N-H4}$  and  $\text{N-H6}$  are free from hydrogen bonding and thus show remarkably small intensities at 3406 and 3442  $\text{cm}^{-1}$  in the simulated spectra.

**Table S2** Comparison between the experimental IR absorption peaks and those in the stimulated 13-molecule-cluster spectrum of melamine related to the characteristic  $\text{NH}_2$  stretching modes. The dominant components of each vibration mode have been highlighted, respectively.

| wavenumber ( $\text{cm}^{-1}$ ) |            | assignments <sup>a</sup> | detailed vibrational components <sup>b</sup> |
|---------------------------------|------------|--------------------------|----------------------------------------------|
| experimental                    | calculated |                          |                                              |
| 3129                            | 3141       | $\nu_s$                  | NH1(m)+NH2(s)+NH3(w)+NH4(w)+NH5(s)+NH6(m)    |
| 3188                            | 3228       | $\nu_s$                  | NH1(w)+NH2(w)+NH3(s)+NH4(m)+NH5(w)+NH6(w)    |
| 3331                            | 3301       | $\nu_{as}$               | NH1(s)+NH2(s)                                |
| 3420                            | 3406       | $\nu_{as}$               | NH3(m)+NH4(s)                                |
| 3468                            | 3442       | $\nu_{as}$               | NH5(m)+NH6(s)                                |

<sup>a</sup> $\nu_s$ : symmetrical stretching vibration,  $\nu_{as}$ : asymmetrical stretching vibration. <sup>b</sup>s: strong, m: medium, w: weak.

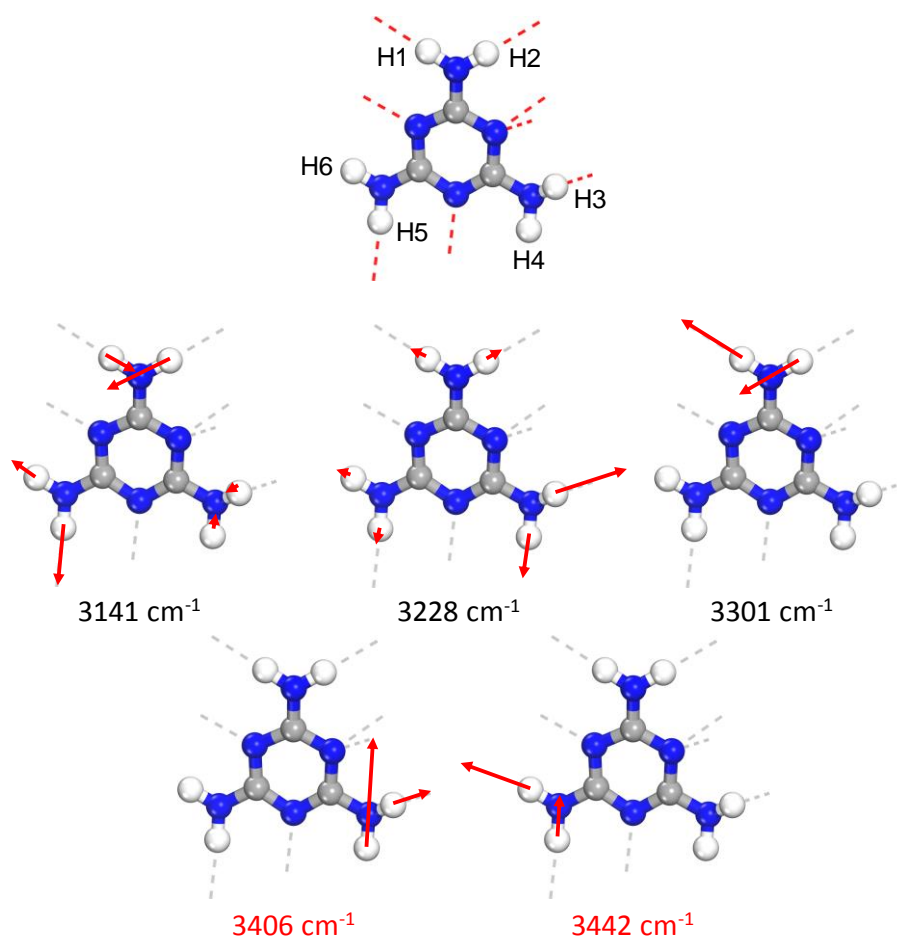

**Fig. S7** Calculated eigenvectors of the characteristic  $\text{NH}_2$  stretching modes of melamine at 3141, 3228, 3301, 3406 and 3442  $\text{cm}^{-1}$ . The latter two modes are dominated by the stretching vibrations of N–H4 and N–H6 bonds, which are free from hydrogen bonding. The C, N and H atoms are distinguished by dark grey, blue, and light grey colors, respectively.

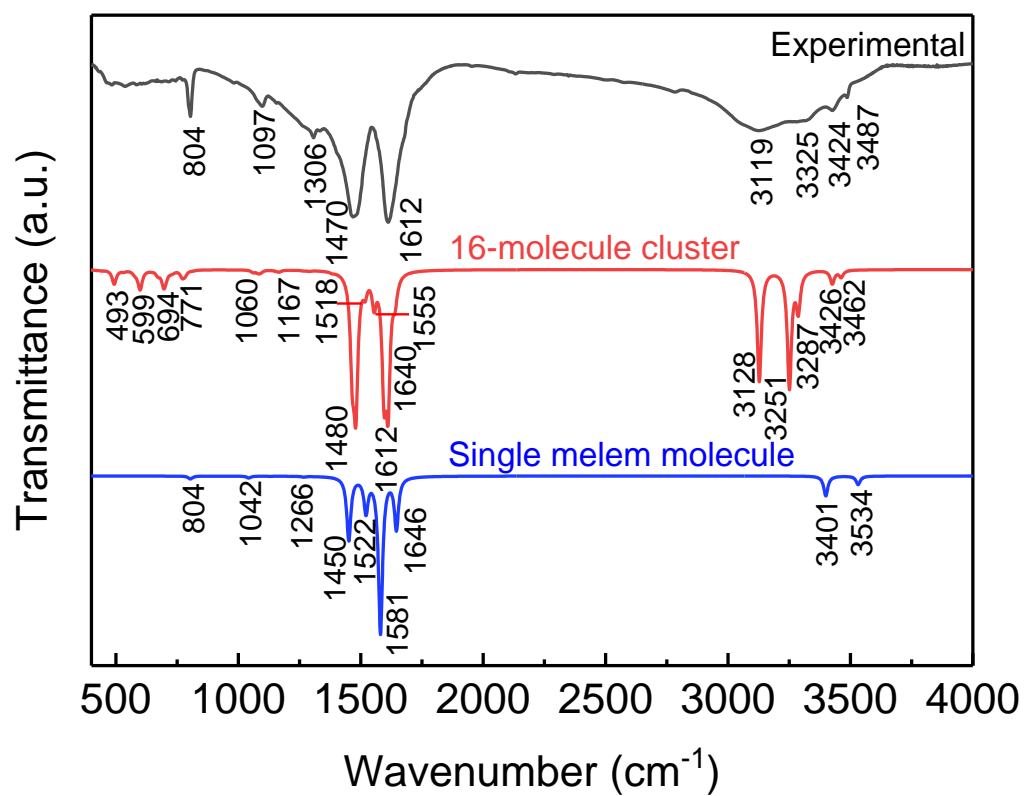

**Fig. S8** Detailed IR peak positions in the experimental and simulated spectra of melem based on different models.

**Table S3** Comparison between the experimental IR absorption peaks and the calculated wavenumbers of melem based on a single molecule and the built 16-molecule cluster and the corresponding combinatorial vibration-mode assignments.

| calculated                      |                  |                                                                        | experimental                    |                                       |
|---------------------------------|------------------|------------------------------------------------------------------------|---------------------------------|---------------------------------------|
| wavenumbers (cm <sup>-1</sup> ) |                  | combinatorial vibration-mode assignments <sup>a</sup>                  | wavenumbers (cm <sup>-1</sup> ) | assignments <sup>S2</sup>             |
| single melem molecule           | 16-melem cluster |                                                                        |                                 |                                       |
|                                 | 493,599,694      | $\gamma(\text{NH})$                                                    | 478,597,740 <sup>b</sup>        |                                       |
| 804                             | 771              | $\gamma(\text{CN}) + \gamma(\text{NH})$                                | 804                             | the ring-sextant out-of-plane bending |
| 1042                            | 1060,1090        | $\rho(\text{NH}_2) + \nu(\text{CN})$                                   | 1097                            | NH stretching                         |
| 1266                            | 1167             | $\rho(\text{NH}_2) + \nu(\text{CN1})^c$                                |                                 |                                       |
|                                 |                  |                                                                        | 1306                            | CNC bending                           |
| 1450                            | 1465,1480        | $\rho(\text{NH}_2) + \delta(\text{NH}_2) + \nu(\text{CN})$             | 1470                            | side-chain CN breathing               |
| 1521                            | 1518             | $\delta(\text{NH}_2) + \nu(\text{CN})^{\text{OR}} + \nu(\text{CN4,5})$ |                                 |                                       |
| 1580                            | 1555             | Ring breathing + $\delta(\text{NH}_2)$                                 |                                 |                                       |
| 1645                            | 1595,1612,1640   | $\nu(\text{CN2-7}) + \delta(\text{NH}_2)$                              | 1612                            | NH <sub>2</sub> bending               |
| 3401                            | 3128             | $\nu_s(\text{N8H}_2)$                                                  | 3119                            |                                       |
|                                 | 3251             | $\nu_{\text{as}}(\text{N8H}_2) + \nu_s(\text{N9H}_2)$                  | 3325                            |                                       |
|                                 |                  |                                                                        |                                 | NH stretching                         |
| 3534                            | 3287,3426,3462   | $\nu_{\text{as}}(\text{NH}_2)$                                         | 3424,3487                       |                                       |

<sup>a</sup> $\nu_s$ : symmetrical stretching vibration,  $\nu_{\text{as}}$ : asymmetrical stretching vibration,  $\nu$ : stretching vibration,  $\beta$ : in-plane bending vibration,  $\delta$ : shearing vibration,  $\rho$ : in-plane rocking vibration,  $\gamma$ : out-of-plane bending vibration, R: mode on the ring atoms, OR: mode out of the ring.

<sup>b</sup>These three peaks are observed in the experimental spectrum in ref. S2 but absent from the spectrum in this study. <sup>c</sup>N atoms are numbered in the top panel of Fig. S9.

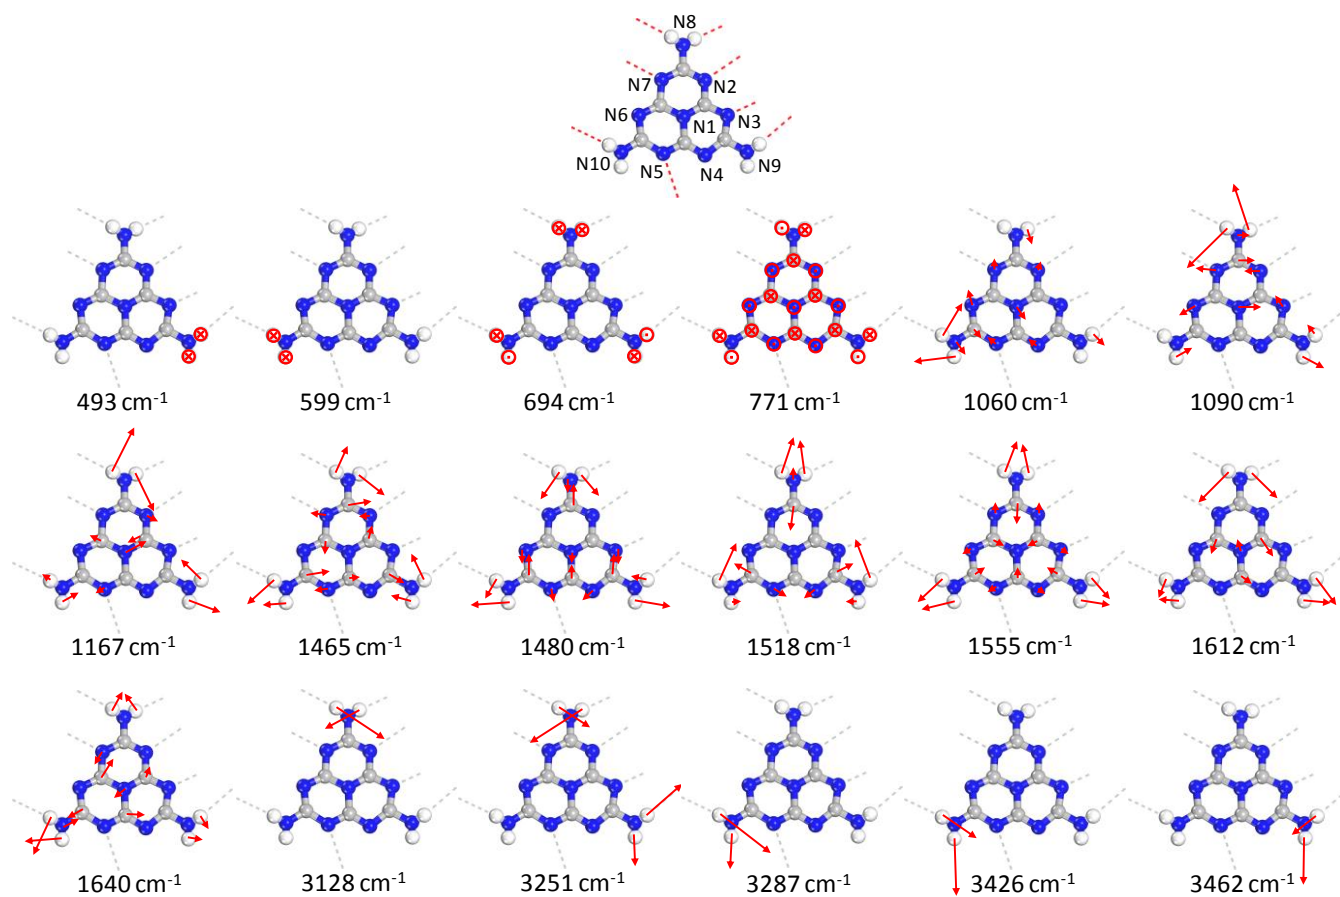

**Fig. S9** Calculated eigenvectors of the characteristic vibrational modes of melem based on the built 16-molecule cluster. The C, N and H atoms are distinguished by dark grey, blue, and light grey colors, respectively.

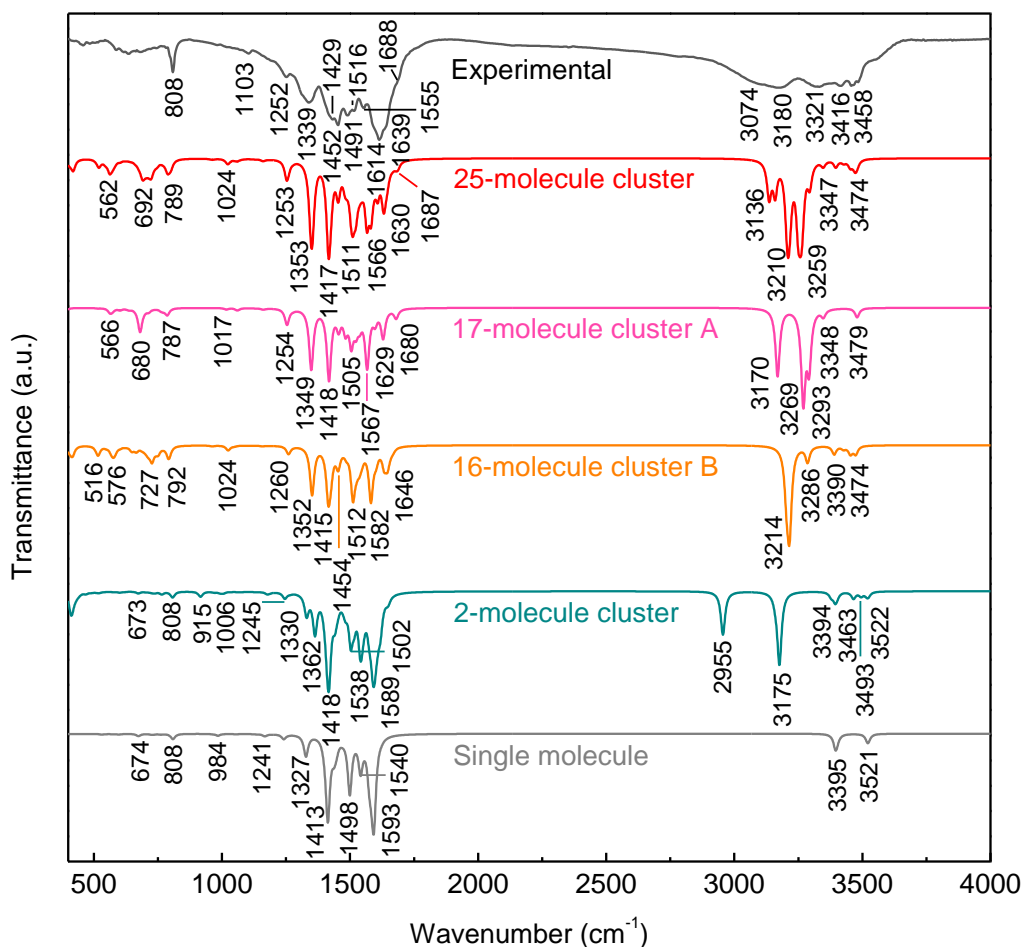

**Fig. S10** Detailed IR peak positions in the experimental and simulated spectra of melam based on different models.

**Note:** The absorption bands in range of  $1200\text{--}1700\text{ cm}^{-1}$  correspond to the vibrational modes of C–N/C=N stretching and NH/NH<sub>2</sub> shearing. As shown in Fig. S10, the peaks at 1253, 1353, 1417, and  $1566\text{ cm}^{-1}$  observed in the 25-molecule-cluster spectrum are dominated by the intramolecular C–N/C=N stretching (Table S5 and Fig. S11), and the corresponding peaks can be identified in other simulated spectra, even the one based on a single molecule. However, the vibrational peaks at 1454, 1511, 1630, and  $1687\text{ cm}^{-1}$  in the 25-molecule-cluster spectrum are mainly related to the NH/NH<sub>2</sub> shearing and NH in-plane rocking, significant differences have been observed in other simulated spectra including those based on the 17-molecule cluster with melam A and 16-molecule cluster with melam B, indicating these vibrational modes are more sensitive to the surrounding crystallographic environments.

**Table S4** Comparison of the experimental IR absorption peaks and the calculated wavenumbers of melam based on different models.

| experimental absorption peak<br>(cm <sup>-1</sup> ) | calculated wavenumbers (cm <sup>-1</sup> ) |                       |                       |                    |                 |
|-----------------------------------------------------|--------------------------------------------|-----------------------|-----------------------|--------------------|-----------------|
|                                                     | 25-molecule cluster                        | 17-molecule cluster A | 16-molecule cluster B | 2-molecule cluster | single molecule |
|                                                     | 562,692                                    | 566, 680              | 516, 576, 727,751     | 673                | 674             |
| 808                                                 | 789                                        | 787                   | 792                   | 808                | 808             |
| 1103                                                | 1024,1060                                  | 1017                  | 1024                  | 915,1006           | 984             |
| 1252                                                | 1253                                       | 1254                  | 1260                  | 1245               | 1241            |
| 1339                                                | 1353                                       | 1349                  | 1352                  | 1330, 1362         | 1327            |
| 1429                                                | 1417                                       | 1418                  | 1415                  | 1418               | 1413            |
| 1452                                                | 1454                                       | 1456                  | 1454                  | 1442               | 1439            |
| 1491,1516                                           | 1511                                       | 1505                  | 1512                  | 1502,1538          | 1498,1540       |
| 1555                                                | 1566                                       | 1567                  | 1582                  | 1589               | 1593            |
| 1614                                                | 1608                                       | 1598                  | 1601                  | 1617               |                 |
| 1639                                                | 1630                                       | 1629                  | 1646                  | 1649               |                 |
| 1688                                                | 1687                                       | 1680                  |                       | <b>2955</b>        |                 |
| 3074                                                | 3136,3159                                  |                       |                       |                    |                 |
| 3180                                                | 3210                                       | 3170                  | 3214                  | 3175               |                 |
|                                                     | 3259                                       | 3269                  |                       |                    | 3395            |
| 3321                                                | 3294                                       | 3293                  | 3286                  |                    |                 |
|                                                     | 3347                                       | 3348                  |                       |                    |                 |
| 3416                                                | 3396,3427                                  |                       | 3390,3426             | 3394,3463          |                 |
| 3458                                                | 3453,3474                                  | 3479                  | 3454,3474             | 3493,3522          | 3521            |

**Table S5** Comparison between the experimental IR absorption peaks and calculated wavenumbers of melam based on the finally built 25-molecule cluster and the corresponding combinatorial vibration-mode assignments.

| calculated (25-molecule cluster) |                                                                       | experimental                    |                                         |
|----------------------------------|-----------------------------------------------------------------------|---------------------------------|-----------------------------------------|
| wavenumbers (cm <sup>-1</sup> )  | combinatorial vibration-mode assignments <sup>a</sup>                 | wavenumbers (cm <sup>-1</sup> ) | assignment <sup>S1,S4</sup>             |
| 562,692                          | $\gamma(\text{NH})$                                                   |                                 |                                         |
| 789                              | $\gamma(\text{CN}) + \gamma(\text{NH})$                               | 808                             | the characteristic sextant ring bending |
| 1024 (molecule B)                | $\rho(\text{N2H})^b$                                                  |                                 |                                         |
| 1060 (molecule A)                |                                                                       |                                 |                                         |
| 1253                             | $\rho(\text{NH}) + \nu(\text{CN})^{\text{R}}$                         | 1252                            |                                         |
| 1353                             | $\rho(\text{NH}) + \nu(\text{CN})^{\text{OR}}$                        | 1339                            |                                         |
| 1417                             | $\delta(\text{NH}) + \nu(\text{CN})^{\text{OR}}$                      | 1429                            |                                         |
| 1454                             | $\delta(\text{NH}) + \nu(\text{CN})^{\text{OR}} + \beta(\text{CN2C})$ | 1452                            | C–N/C=N stretching and NH/NH2 shearing  |
| 1511                             | $\delta(\text{NH}) + \beta(\text{CNH})$                               | 1491,1516                       |                                         |
| 1566                             | $\delta(\text{N1H}) + \rho(\text{N3H}) + \nu(\text{CN})^{\text{R}}$   | 1555                            |                                         |
| 1608                             | $\rho(\text{NH})$                                                     | 1614                            |                                         |
| 1630,1687                        |                                                                       |                                 |                                         |
| 3136,3159,3210                   | $\nu_{\text{s}}(\text{NH}_2)$                                         | 3074,3180                       |                                         |
| 3249,3259                        | $\nu_{\text{as}}(\text{NH}_2) + \nu(\text{N2H})$                      | 3321                            |                                         |
| 3294                             | $\nu_{\text{s}}(\text{NH}_2)$                                         |                                 | characteristic N–H stretching           |
| 3347                             | $\nu(\text{N2H})$                                                     | 3416                            |                                         |
| 3396,3427                        | $\nu_{\text{as}}(\text{NH}_2)$                                        | 3458                            |                                         |
| 3453,3474                        |                                                                       | 3562                            |                                         |

<sup>a</sup> $\nu_{\text{s}}$ : symmetrical stretching vibration,  $\nu_{\text{as}}$ : asymmetrical stretching vibration,  $\nu$ : stretching vibration,  $\beta$ : in-plane bending vibration,  $\delta$ : shearing vibration,  $\rho$ : in-plane rocking vibration,  $\gamma$ : out-of-plane bending vibration, R: mode on the ring atoms, OR: mode out of the ring.

<sup>b</sup>N atoms are numbered in the top panel of Fig. S11.

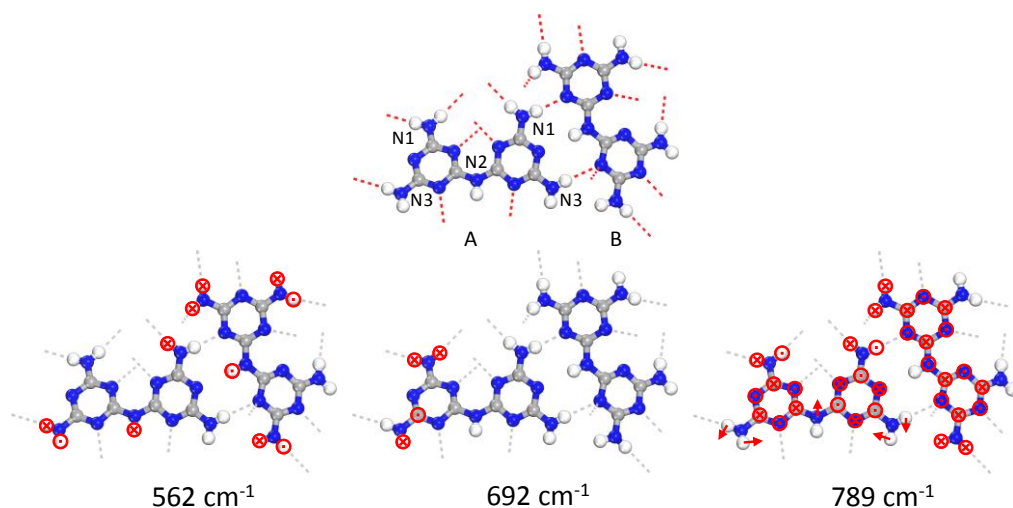

(to be continued)

(continued)

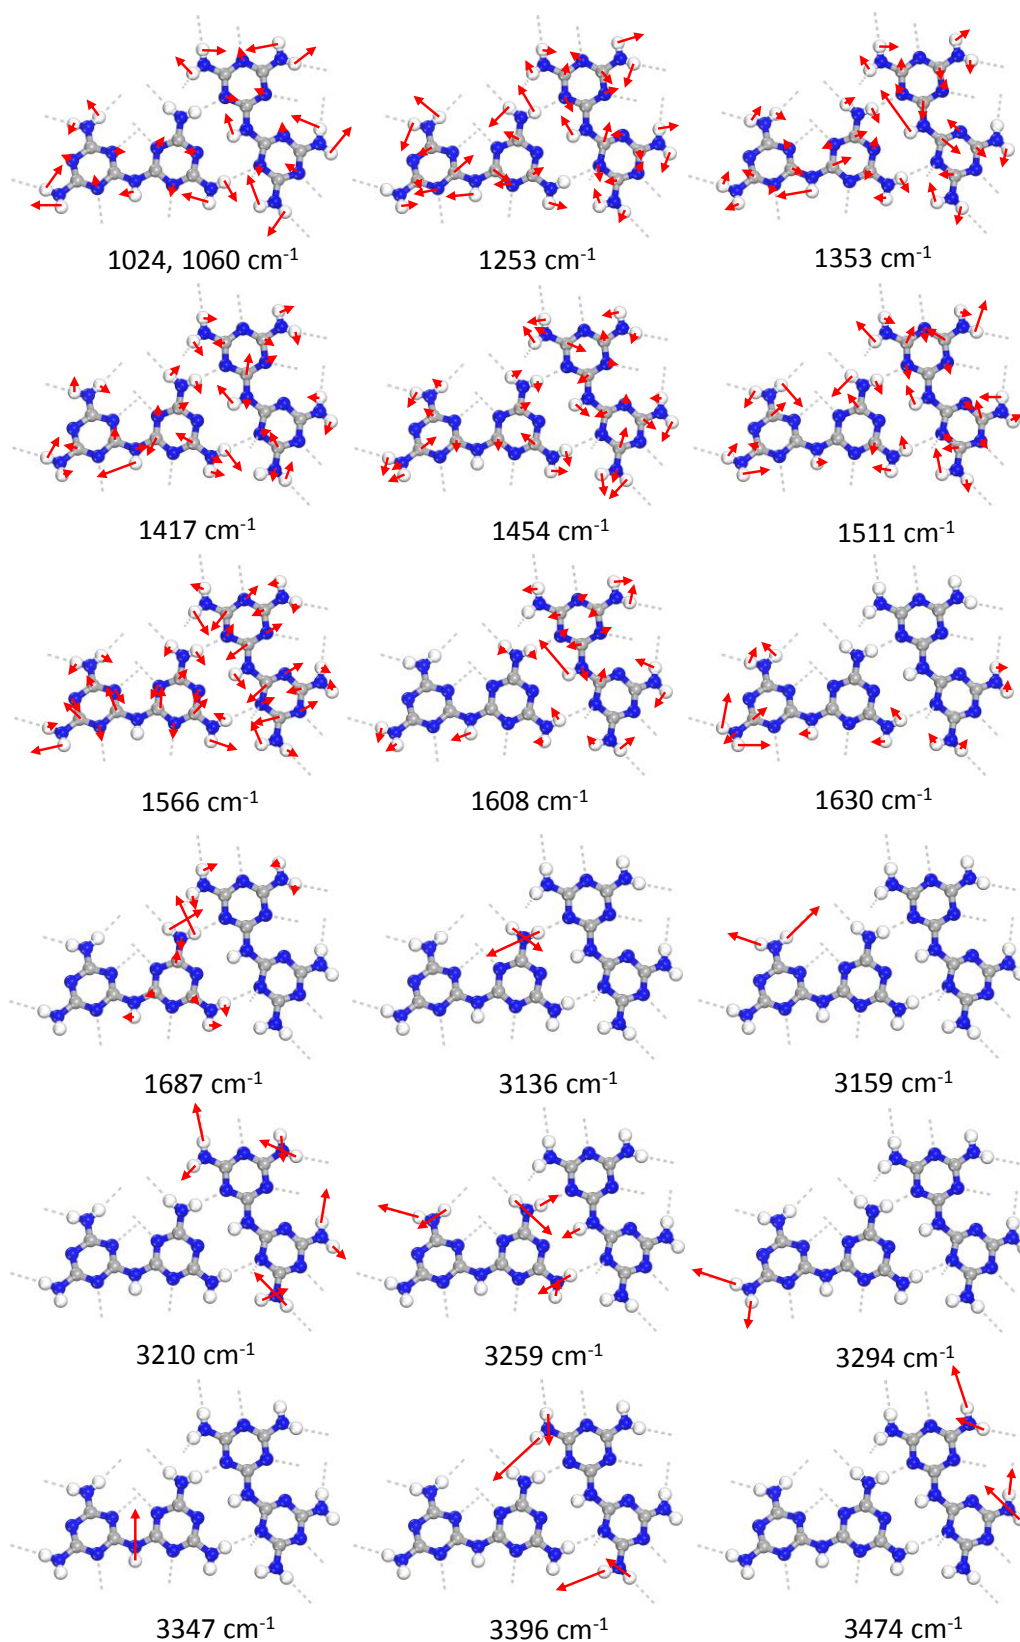

**Fig. S11** Calculated eigenvectors of the characteristic vibrational modes of melam based on the finally built 25-molecule cluster. The C, N and H atoms are distinguished by dark grey, blue, and light grey colors, respectively.

## References

- S1 B. V. Lotsch and W. Schnick, *Chem. Eur. J.*, 2007, **13**, 4956–4968.
- S2 B. Jürgens, E. Irran, J. Senker, P. Kroll, H. Müller and W. Schnick, *J. Am. Chem. Soc.*, 2003, **125**, 10288–10300.
- S3 X. Yuan, K. Luo, K. Zhang, J. He, Y. Zhao and D. Yu, *J. Phys. Chem. A*, 2016, **120**, 7427–7433.
- S4 E. Wirnhier, M. B. Mesch, J. Senker and W. Schnick, *Chem. Eur. J.*, 2013, **19**, 2041–2049.
